1 **Present and Future Ecological Niche Modeling of Rift Valley fever in**  
2 **East Africa in Response to Climate Change**

3 Caroline Muema<sup>1,2,3</sup>, Boniface K. Ngarega<sup>4</sup>, Elishiba Muturi<sup>1,2,3</sup>, Hongping Wei<sup>1\*</sup>, Hang Yang<sup>1\*\*</sup>

4 <sup>1</sup> *Key Laboratory of Special Pathogens and Biosafety, Center for Biosafety Mega-Science, Wuhan*  
5 *Institute of Virology, Chinese Academy of Sciences, Wuhan 430071, China*

6 <sup>2</sup> *Sino-Africa Joint Research Center, Chinese Academy of Sciences, Wuhan, 430074, Hubei, PR China*

7 <sup>3</sup> *University of Chinese Academy of Sciences, Beijing, 100049, PR China*

8 <sup>4</sup> *CAS Key Laboratory of Aquatic Botany and Watershed Ecology, Wuhan Botanical Garden, Chinese*  
9 *Academy of Sciences, Wuhan, 430074, Hubei, PR China*

10

11

12

13 \*Authors for correspondence:

14 **Hongping Wei\***;

15 **E-mail:** [hpwei@wh.iov.cn](mailto:hpwei@wh.iov.cn)

16 **Hang Yang\*\***;

17 **E-mail:** [yangh@wh.iov.cn](mailto:yangh@wh.iov.cn)

18

## ABSTRACT

19 Rift Valley fever (RVF) has been linked with recurrent outbreaks among humans and livestock in  
20 several parts of the globe. Predicting RVF's habitat suitability under different climate scenarios  
21 offers vital information for developing informed management schemes. The present study  
22 evaluated the probable impacts of climate change on the distribution of RVF disease in East Africa  
23 (E. A.), using the maximum entropy (MaxEnt) model and the disease outbreak cases. Considering  
24 the potential of the spread of the disease in the East Africa region, we utilized two representative  
25 concentration pathways (RCP 4.5 and RCP 8.5) climate scenarios in the 2050s and 2070s (average  
26 for 2041-2060, and 2061-2080), respectively. All models had satisfactory AUC values of more  
27 than 0.809, which are considered excellent. Jackknife tests revealed that Bio4 (temperature  
28 seasonality), land use, and population density were the main factors influencing RVF distribution  
29 in the region. From the risk maps generated, we infer that, without regulations, this disease might  
30 establish itself across more extensive areas in the region, including most of Rwanda and Burundi.  
31 The ongoing trade between East African countries and changing climates could intensify RVF  
32 spread into new geographic extents with suitable habitats for the important zoonosis. The predicted  
33 suitable areas for RVF in eastern Kenya, southern Tanzania, and Somalia overlaps to a large extent  
34 where cattle keeping and pastoralism are highly practiced, thereby signifying the urgency to  
35 manage and control the disease. This work validates RVF outbreak cases' effectiveness to map the  
36 disease's distribution, thus contributing to enhanced ecological modeling and improved disease  
37 tracking and control efforts in East Africa.

38 **Keywords:** Ecological niche modeling, East Africa, Climate change, Outbreak cases, Maxent; Rift  
39 Valley fever

40

## 41 **Introduction**

42 Industrial civilization progress fosters human society's growth (1) and poses many global  
43 challenges, including economic, energy, population, environmental challenges, and climate  
44 change (2). Climate change, defined as the gradual alteration of climatic properties or weather  
45 patterns in a statistically identifiable manner, may occur naturally or be mainly anthropogenic (3).  
46 Human activities have been shown to have facilitated about 1.0°C of global warming (4), and it is  
47 projected that these temperatures may rise to 1.5°C by the 2050s if the present trend continues (5).  
48 This, in essence, will lead to cycles of extreme weather, heatwaves, and flooding.

49 Fluctuations in climate have been related to many prevalent diseases triggered by floods and  
50 heatwaves, which alter the transmission of infectious diseases (6-7). Diseases transmitted by  
51 vectors have a propensity for association with specific environmental conditions, following their  
52 sensitivity to those conditions (8-9). The vector limit of climate tolerance constrains the occurrence  
53 and distribution of viral zoonosis (5, 10). Indeed, climate change will likely affect vector-borne  
54 disease (VBD) distribution and their emergence in areas where the diseases have not been observed  
55 before due to human movement, animal transportation, and vector range expansion (11-12).  
56 Climate and weather may also influence pathogens' ecology as pathogens replicate at ambient  
57 temperatures (13).

58 Rift Valley fever (RVF), which has intricately multispecies epidemiology, is a mosquito-borne  
59 zoonosis caused by the Rift Valley fever virus (RVFV). Previous studies have revealed that many  
60 vectors are responsible for RVFV transmission in Africa, including *Culex sp.*, *Aedes sp.*, and  
61 *Mansoni sp.* (14-15). RVF disease is known to cause recurrent epidemics in Africa, especially in

62 the East African region (16-17), where it has led to significant economic losses due to livestock  
63 deaths and human illness (18).

64 The extent and frequency of weather events are projected to change with global climate change  
65 (19), which will, in turn, increase the risk, frequency, and distribution of RVF (18, 20). Climate  
66 variations in areas with similar conditions could result in new RVF outbreaks and overburden in  
67 RVF endemic regions (21-22). Besides, future climate change effects have proven to be  
68 challenging to evaluate, but infectious zoonotic diseases will undoubtedly have an increased  
69 impact on global health (7). Therefore, improved mitigation and management strategies of climate-  
70 sensitive zoonosis are unreservedly essential (23), and the effective modeling of the climate change  
71 impacts on their spread is vital for understanding the disease and will help future interventions  
72 (24).

73 Previous studies have utilized different modeling approaches to determine the influence of  
74 climate change on RVF distribution. For instance, the SEIR model has been used to assess the  
75 climate change impact on RVF dynamics by combining both vertical transmission and human to  
76 mosquito transmission with climate-driven parameters, i.e., temperature and precipitation (21).  
77 Mathematical models, e.g., the Liverpool RVF model, have been used to describe the intricate  
78 relationship between the host epidemiology, the vector's life cycle coupled with climatic factors  
79 (25). Ecoepidemiological mechanistic models have been utilized to explain how vectors' ecology  
80 and RVF's epidemiology are influenced by temperature and the presence of water bodies (15).  
81 Bayesian models have been implemented to produce risk maps of RVF using spatial and seasonal  
82 environmental drivers, together with the effects of climatic oscillations (18). Predictive models,  
83 e.g., the Species distribution models (SDMs), commonly referred to as Ecological Niche Models

84 (ENMs), have been applied to assess the distribution of RVF in Africa using environmental  
85 covariates; either regionally (26) or locally (27-29).

86 The fine-scale assessment of RVF disease outbreak and distribution in East Africa in an ENM  
87 approach has been scantily assessed under a climate change context (17), and limited information  
88 is available on the influence of global climate change on RVF distribution under future projections.  
89 It has otherwise been overscored by the overall modeling of the disease's distribution across the  
90 African continent reported elsewhere (18). Therefore, we build upon the previous studies  
91 framework to bridge this knowledge gap by conducting the fine-scale distribution of RVF using  
92 environmental covariates (i.e., bioclimatic, land-use, livestock, and human density variables) to  
93 assess their influence on the distribution of RVF. Here, we used the Maximum Entropy (MaxEnt)  
94 in an ENM approach to evaluate the RVF current range dynamics, identified potential hotspots for  
95 the emergence and re-emergence, predicted its future climatic suitability, and assessed the  
96 potential spread risks of RVF in East Africa. The standard and efficiency of mitigation strategies  
97 against RVF in East Africa are vital in light of the risks posed by the spread of this important  
98 zoonotic.

99 We (a) tested the advantages of integrating RVFV outbreaks, livestock, and human population  
100 densities in ENMs to locate areas of high environmental suitability for the disease in East Africa,  
101 and (b) generated a risk map of the suitable RVF niches. The present results highlight the  
102 importance of integrating outbreak cases to simulate zoonotic habitat suitability and assess a  
103 restricted region compared to a broader one by providing the potentially missed information or  
104 risk areas that could be otherwise overlooked, thus refining the appropriateness of ENMs.

105

## 106 **Results**

### 107 **RVF risk distribution**

108 We retained 233 RVF outbreak records after initial data cleaning and 186 after a spatial rarefying  
109 approach (Figure 1). Package ENmeval results submitted the usage of hinge features for RVFV  
110 modeling. A model is good when with AUC values above 0.8. The current distribution model for  
111 RVF had an average AUC of 0.886, signifying the model's good performance (Figure 2).

112 Significant predictors of RVF risk distribution were temperature seasonality (Bio4), land use,  
113 population density, precipitation of coldest quarter (Bio19), elevation, and cattle, which  
114 cumulatively contributed to 55.3% of the distribution of RVF in East Africa. Of the six factors, we  
115 observe that temperature seasonality has the highest contribution (10.6%) to the final model (AUC  
116 = 0.886) (Table 2; Figure S1). Jackknife analysis showed that cattle density, sheep density, goat  
117 density, and human population density had the most significant gain when used alone, revealing  
118 that each has valuable information when used independently. When the sheep density variable is  
119 excluded, we observe that the most gain is decreased, inferring that this variable has a lot of  
120 information absent in the other variables (Figure S2). The mean temperature of the wettest quarter  
121 (Bio8) and goats were marginally important in determining the distribution of RVF in East Africa,  
122 and excluding them did not rigorously influence the performance of the model. The model  
123 predictions for the current potential distribution for the RVF were high in Kenya and Tanzania.  
124 We also identified that high RVF suitability areas concur with low elevation areas 10 - 1500 m  
125 a.s.l. (Figures 1 and 2).

126 The geographic distribution of predicted habitat suitability for RVF across East Africa is  
127 defined in more detail below and outlined in Figure 2. The highest probability occurrence is

128 estimated for eastern Kenya and southern Somalia, east-central to southern Tanzania, north of  
129 Lake Malawi, central Rwanda, southwestern Uganda, south of Mt. Kilimanjaro, and along the  
130 coastline from Somalia to Tanzania through Kenya. The lowest habitat suitability for RVF in the  
131 current period are projected for a large area of Tanzania Plains, northern Uganda, and northwestern  
132 Kenya towards Lake Turkana.

133

### 134 **Future predicted RVF probable distribution for 2050 and 2070**

135 The model performance of future RVF potential distribution was assessed according to the AUC  
136 values. All the AUC values for the period 2050 and 2070 under the two RCPs gave satisfactory  
137 values, ranging between 0.809 and 0.895, the highest (Table 2). The general distribution patterns  
138 throughout East Africa between the present-day and future models outlined realistic resemblances  
139 apart from some areas. Additionally, our model projections for 2050 and 2070 revealed that RVF  
140 differs in potential risk areas among both the RCPs, with an increase and decrease in its habitat  
141 suitability (Figure 3). Under RCP 8.5 and RCP 4.5 scenarios in the period 2050 and 2070, RVF's  
142 habitat suitability was observed to expand in the Somalia border with Kenya, Southern parts of  
143 South Sudan, and contract in southwestern parts of Uganda (Figure 4). There was a sizeable  
144 expansion in habitat suitability for RVF in southern and central Uganda in the period 2050 and  
145 2070 under RCP 4.5 and RCP 8.5. A large area in northern Zambia in the period 2050 was  
146 projected to expand under both RCP 4.5 and RCP 8.5 scenarios. In contrast, RVF's habitat  
147 suitability in Rwanda was observed to contract in all future scenarios under both periods.

148

## 149 **Discussion**

150 Knowledge of zoonotic diseases' prevalence is usually the main driving force behind evaluating  
151 how they thrive. Developing species distribution models of such diseases may help researchers  
152 quantify the magnitude, extent, and risks posed to humans, plants and animals, and their potential  
153 impacts on communities (30-31). In this study, we present the main results of MaxEnt modeling  
154 using environmental covariates and RVF outbreak cases on the disease distribution in East Africa.  
155 This is, to our knowledge, one of the most comprehensive studies about the topic in the region.

### 156 **Uncertainty of the results**

157 Predictive habitat suitability in an ENM approach for any zoonotic is efficient as this helps to  
158 inform applied management (29). Regardless, several demerits still exist to niche modeling, for  
159 instance, low transferability in the future and the high differences between simulation results and  
160 the suitable niches for the diseases, which might lead to biased conclusions drawn from the models.  
161 Therefore, improving the simulated model transferability may generate relevant reference data for  
162 management and disease tracking and accurately predict potential niches.

163 Previous studies have utilized MaxEnt models that have proved to outperform other models  
164 (32). The present study models were validated by AUC statistics of the ROC, which showed high  
165 reliability. Nevertheless, few uncertainties still existed that could not be avoided in the simulations  
166 of the models, just like any other model. For instance, for some points that lacked absolute  
167 coordinates, online gazetteers and Google earth were used to geo-reference these localities using  
168 the available descriptions.

### 169 **Potential distribution and importance of variables**



170 A set of bioclimatic variables, elevation, and animal and human population densities contribute to  
171 RVF distribution in East Africa. The variables Bio4 (temperature seasonality), land use, and  
172 population density contributed strongly to defining the distribution RVF. The variations in  
173 temperature (temperature seasonality) appeared to favor the expansion of the distributional ranges  
174 of RVF from lowlands to highlands or mountainous regions. The results are consistent with  
175 previous reports that RVF persists in the middle to low land areas in southern Africa and Eastern  
176 Africa (18) and occupies areas with dynamic temperature conditions and varying habitats ranging  
177 from wet to dry (17, 21).

178 The highest suitable areas for the distribution of RVF were located in eastern Kenya and  
179 southern Somalia, southern Tanzania and along the Indian Ocean coastline, and in some patches  
180 on the borders between Uganda and Kenya, and central Rwanda. These areas were observed to be  
181 low to midland areas. Livestock keeping is mainly practiced in the lowlands to midlands or plains,  
182 where grasslands are denser than forests (17, 27); as such, livestock densities were specified by  
183 the models as important variables affecting RVF distribution. Therefore, these areas are ideally  
184 suitable niches for the persistence of RVF and correspond to areas where cattle keeping is practiced  
185 with altitude ranging from 0-3000asl and with varying microclimates with low to high temperature  
186 and low to high precipitation. Consequently, from the results, we deduce that livestock densities  
187 seemingly were essential components for all RVF model distributions.

188 Our results agree with various zoonosis characteristics that can reappear and emerge in newly  
189 established areas (31). For instance, previous reports have shown that in the Indian Ocean coasts  
190 of E.A, the Chikungunya epidemic emerges after warm and dry conditions preceded by heavy rains  
191 (33-34). These heavy rains are observed to replenish water reserves during drought periods, and  
192 in turn, vectors breed successfully and cause risks for Chikungunya circulation (34).

193 **Future distributions**

194 Future projections showed that suitable niches would expand in the 2050s and the 2070s under  
195 most climate change scenarios, while in some areas, the niches would contract. Under the RCP8.5  
196 scenario of no mitigation of greenhouse gas emission in the 2050s and the RCP4.5 of controlled  
197 greenhouse gas emission, we observe the highest range expansion (Figure 4). We also observe  
198 RVF niches' contraction in northern Kenya, southern Tanzania in the region bordering Zambia,  
199 the coastal areas in all scenarios. Similarly, RVF ranges are observed to decrease most under  
200 RCP4.5 in the 2050s. Under all RCP scenarios except RCP8.5 in the 2050s, parts of central and  
201 western Uganda, southern Rwanda, and northern Burundi observe significant reduction of the  
202 suitable RVF niches. These results are comparable to a previous study by Bett et al. (17). Changes  
203 in rainfall and temperatures will likely make high elevation regions more susceptible to global  
204 warming, which will have an adverse impact on the RVF niches (15). Range expansion under  
205 climate change is typical of VBDs, which are favored by an increase in temperatures and an  
206 increase in precipitation (35-36). The West Nile virus ranges were also predicted to expand in the  
207 future in a previous study (32).

208 Undoubtedly, most RVF ranges in East Africa will increase due to climate change, pastoralism,  
209 human movement, anthropogenic practices, and trade in the East Africa region (37, 38, 39). Due  
210 to the alteration of rainfall and temperatures, the RVF's vector limits are largely susceptible to  
211 global warming, which will have a considerable impact on their habitat preferences and  
212 reproduction sites' availability (24, 35). Global climate change is projected to influence vectors,  
213 hosts, and VBDs distributions since they are all affected by temperatures (24). Therefore, VBDs  
214 will likely move polewards and to higher elevations as rapid changes in temperature drive species  
215 migrations to higher elevations (39). In addition, the gradual population growth and convention of

216 non-agricultural areas in highlands could pose risks of RVF vectors establishment in higher  
217 elevations and latitude gradients.

218 The recurrence of pathogens by opportunistic host switching may persist as a significant cause  
219 of human transmittable diseases (20). The present-day niche assessment for RVF ranges and their  
220 habitat preference changes due to global climate change demonstrates concern for the public health  
221 status and further damage to livestock production. Strategies for improving public health have  
222 concentrated on enhancing monitoring in places with suspected high prevalent areas (40). With  
223 each successive outbreak, RVF has shown to be expanding; this could be attributed to the  
224 establishment of favorable climate in new areas through climate change and the introduction of  
225 vectors into new territories with favorable environments.

226 While climate is known to structure the ecology and distribution of species (35), other factors  
227 also come into the picture, for instance, vector abundance and distribution, land use; a sensible  
228 assumption is that climate is a significant driving force. It is estimated that RVF overburden may  
229 cause significant losses in cattle production in East Africa; however, monetary losses arising from  
230 it have not been accurately quantified and have continually risen over the years (41). To mitigate  
231 the losses brought about by VBDs, and effectively control their re-emergence, the epidemiology  
232 of the vectors and pathogens, hosts, and transmission modes for these diseases and realized niches  
233 must be understood (42, 43).

### 234 **Implications of the study**

235 The current study that included RVF modeling in East Africa is essential in disease management,  
236 especially in regions likely to experience reoccurrence and re-emergence. Therefore, this study  
237 supports the attentiveness and management schemes of the RVF virus spread potential under

238 climate change. Specifically, our results highlight the significance of using the disease outbreak  
239 cases to simulate the potential niches for the RVF disease in East Africa in an ENM approach,  
240 thereby revealing regions that would be otherwise overlooked when tracking the disease. The  
241 current study also highlights some areas at higher risks and prevalence of the disease, especially  
242 in Kenya and some adjacent regions in Somalia. While we cannot ascertain this from the current  
243 models, we infer that human population movement, cattle movement, and Bio4 (temperature  
244 seasonality) will play a significant role in spreading RVF in the near future (35).

245 Anthropogenic activities and cattle practicing, especially in densely populated areas, are likely  
246 to enhance RVF spread (37). Similarly, the vector fitness is affected directly or indirectly by  
247 temperature and increases typically with an increase in temperature, although results may differ  
248 among RVF vectors (24, 35). In addition, temperature also significantly affects vectors' life history  
249 traits at their developmental stages, including behaviors like mating and blood-feeding (24  
250 Approximately 30% of the total population across the East Africa region inhabits areas with  
251 suitable climatic conditions and competent mosquito vectors for the persistence and transmission  
252 of RVF (45).

253 The present study offers a comprehensive investigation of the effects of environmental factors  
254 linked with RVF distribution in East Africa. Our results infer that the present distribution could be  
255 due to the contemporary climate jointly with human population density and land use.  
256 Nevertheless, the absolute contributions of climate change are not apparent. Our models also  
257 indicated that climate (Bio4) had the strongest effect on the niche models developed for RVF,  
258 followed by land use and population density in that order. These results are in line with previous  
259 reports that RVF is mainly affected by environmental factors (21, 25, 29). It is not clear whether

260 these categories' predictions result from the locations selected for this study; however, the models  
261 were developed impartially and represent the known biology of RVF.

262 The forecasted increases in RVF niches will affect livelihood in E.A, particularly pastoralists  
263 who might suffer substantial losses in their livestock. Therefore, more detailed analyses are  
264 especially required to assess the localized influence of anthropogenic activities and movement  
265 within the region. We also note that the predicted contraction in RVF ranges in some areas is not  
266 guaranteed. This is primarily due to the continued urbanization and human growth, as well as the  
267 conversion of the forested regions into farmlands, which might increase the potential sites for the  
268 persistence of RVF vectors. Therefore, improved surveillance in these regions is imperative to  
269 mitigate the risks that would otherwise be overlooked (22).

270

## 271 **Conclusions**

272 Forecasting how future climate change will impact the transmission of VBDs has proven to be  
273 challenging. This is because the relationships between nature, human activities, and climate are  
274 complex. The current research discourses the biological response of RVF considering different  
275 climate scenarios in the current and future timeframes and its potential habitat suitability. The  
276 present climate scenario shows that RVF's distribution is mainly in drier areas, plains, and  
277 highlights where most animal farming and pastoralism are practiced. The temperature seasonality  
278 (Bio4), land use, and population density play an important role in controlling the biogeographic  
279 patterns of RVF in the East Africa region. Thus, ENMs play an essential role in determining  
280 potential ranges suitable for RVF establishment and where the disease is most sensitive to climate  
281 change.

282 Although a sizeable number of studies have been utilized and developed in assessing the  
283 distribution of zoonotic diseases and the results yielded a vital contribution to the field, the present  
284 study has shown usefulness in presenting the diseases' distribution using their actual range  
285 outbreaks. This helps to directly capture the relevant information on biotic and abiotic factors  
286 surrounding the spread of such diseases. Particularly, modeling the RVF distribution using vectors  
287 may sometimes be problematic, especially since a vector does not directly translate to RVF's  
288 presence, and these intermediate interactions between the vectors and disease are at times less  
289 suitable descriptors of zoonotic diseases. Thus, using the disease outbreak data from the hosts may  
290 improve the species distribution of zoonotic diseases.

291 As a result of the increased anthropogenic activities, livestock movement, urbanization, and  
292 predicted climate change, there is a real risk that these factors might jointly enable the spread of

293 RVF in East Africa. East Africa continues to be an endemic region for RVF, and the ongoing trade  
294 partnerships (38) could lead to the introduction of the virus to new non-endemic regions, e.g., in  
295 Uganda and Burundi. Therefore, it is vital to assess its effect on RVF distribution and spread to  
296 successive suitable areas to help design timely mitigation measures and decrease the negative  
297 impacts of future climate change. The models generated here suggested that in the future, as a  
298 result of climate change, there would be more outbreaks in new areas that were less infested by  
299 the disease, e.g., regions in Rwanda and southern Tanzania. Our present findings might help track  
300 the zoonosis in East Africa and help guide targeted management of an outbreak of the disease in  
301 marginalized and least thought regions.

302

## 303 **Materials and methods**

### 304 **Study Area**

305 East Africa is the eastern region of the African continent lying between the latitudes 5.2°N,  
306 11.77°S, and longitudes 28.8°E, 41.2°E, and includes five countries: Kenya, Tanzania, Uganda,  
307 Rwanda, and Burundi. The East Africa region has a generally tropical climate. Highlands have  
308 lower average temperatures compared to areas with low elevation. There are two main rainfall  
309 seasons, the long rains season from October to December and the short rains season from March  
310 to May (46). East Africa precipitation is exceptionally heterogeneous, and this is attributed to the  
311 differing topography, maritime influence, lakes, tropical circulation, and elevation (46). Mean  
312 annual rainfall in a large part of the region falls between 800-1200 mm. East Africa's vegetation  
313 can be classified into; forest, grassland, woodland, bushland, thicket and scrub, permanent swamp  
314 vegetation, wooded grasslands, and semi-desert (47). The region covers 3,678,394 square km, and  
315 the highest peak is Mt Kilimanjaro at 5000 m a.s.l. One feature that stands out in East Africa is the  
316 Rift Valley that cuts through the region from Kenya southward to Tanzania through Uganda. The  
317 most common animal practice is cattle herding, especially in Kenya, followed by Tanzania.

318

### 319 **Occurrence and environmental data**

320 The availability of localities or occurrences is critical in ecological niche modeling when the  
321 simulation of climatically suitable areas of a target disease is intended. Therefore, we obtained the  
322 presence data (geographical coordinates) for RVFV outbreak cases during 2004-2020 from the  
323 Global Animal Disease Information System (EMPRES-i; <http://empres-i.fao.org/>), and previously  
324 published literature. For records that were only provided on the District level and descriptions of



325 the RVF reported cases, we used the Online Gazetteer and Google Earth software to geo-reference  
326 them to nearest centroids. In total, we obtained 300 coordinates for RVFV cases. Duplicate records  
327 and fuzzy records were manually filtered in Microsoft Excel, followed by spatial rarefying of the  
328 remaining coordinates to exclude the correlated points within 10 by 10 km grid cells using  
329 SDMToolbox (48). Spatially correlated occurrence points would otherwise cause overfitting of the  
330 models (49). Lastly, the Excel file was converted to the “.csv” format usable in MaxEnt. The  
331 spatially rarefied points used for RVF modeling in the present study are provided in Supplementary  
332 Table 1 (Figure 1).

333 Bioclimatic variables for performing RVF distribution modeling were derived from  
334 Worldclim2 (<http://www.worldclim.org>) at 2.5arc-min (50). This data includes nineteen predictor  
335 variables with precipitation and temperature dependent information within a year. The current  
336 period was represented by bioclimatic variables spanning 1970-2000. Besides, for future periods,  
337 we utilized the global circulation models (GCM)—community climate system model version 4  
338 (CCSM4; 51), obtained from WorldClim, to simulate the habitat suitability of RVF (period 2050  
339 average for 2041-2060, and 2070 average for 2061-2080), at a spatial resolution of 2.5arc-min.  
340 For this GCM, we selected two representative concentration pathways (RCPs) to represent  
341 intermediate and extreme greenhouse gas emissions (RCP 4.5 and RCP 8.5), respectively,  
342 therefore adequately accounting for future climate uncertainties. These RCPs are consistent with  
343 the Intergovernmental Panel's 5th report on climate change (4)(IPCC; 2014). Modeling climate  
344 change impacts on VBDs has broadly used the CCSM4 model (17). All the raster layers were  
345 clipped to match our study area, then converted to ASCII format in ArcGIS 10.5.

346 Spatially correlated variables may sometimes lead to inaccurate results of model simulations  
347 (52). Therefore, a Pearson correlation of the 19 Bioclimatic variables was implemented on

348 ENMtools to eliminate highly correlated climatic variables at a threshold of  $r \geq 0.8$ . Eventually,  
349 eight variables were selected for the subsequent analyses following their collinearity: Bio2 Mean  
350 Diurnal Range (Mean of monthly (max temp - min temp), Bio4 (temperature seasonality), Bio7  
351 (Temperature Annual Range (Bio5-Bio6)), Bio8 (Mean Temperature of Wettest Quarter), Bio13  
352 (Precipitation of Wettest Month), Bio14 (precipitation of the driest month), Bio18 (Precipitation  
353 of Warmest Quarter), Bio19 (Precipitation of Coldest Quarter) (Table 1). Further, elevation was  
354 derived from Shuttle Radar Topography Mission (<http://glcf.umiacs.umd.edu>). The elevation layer  
355 was used to calculate “slope” on ArcGIS 10.5. In addition, we added livestock (viz. cattle, goat,  
356 sheep) and population density layers obtained from Geo-Network with a  $10 \times 10$  km resolution  
357 (<http://www.fao.org/geonetwork/srv/en/metadata.show>). These datasets were resampled to match  
358 the bioclimatic variables spatial resolution of 2.5arc-min.

### 359 **Ecological Niche modeling and validation.**

360 The present-day niches for RVF were modeled for the three periods (total of five models): The  
361 current period, the year 2050 (RCP 4.5 and 8.5), and the year 2070 (RCP 4.5 and 8.5) using MaxEnt  
362 3.4 (53). We divided our data into a training dataset, including 80 percent and 20 percent test data,  
363 to reduce uncertainty and errors from the data. The model was run with background points of  
364 10,000 and allowed to converge at  $10^5$ , after 5,000 iterations. The MaxEnt models were made  
365 based on the 10-fold replicates, where cross-validation was allowed (52). Over prediction bias and  
366 model validation were performed by assessing the area under curve (AUC) stats of the Receiver  
367 Operating Characteristics (ROC) in MaxEnt (54). All averaged ASCII files were converted to TIFF  
368 format using ArcGIS 10.5.

369 The multivariate environmental similarity surfaces (MESS) analysis was run in MaxEnt to  
370 increase the models' reliability for future projections (55). This function (MESS) examines the

371 multivariate extrapolation under various climate scenarios in the future, checks for potential new  
372 climatic environments, and assesses if the future predictions are out of range, with the current  
373 projections as the baseline. In addition, distributional changes between the current and future  
374 periods were evaluated to determine the impact of climate change on RVF. To achieve this, we  
375 converted all the thresholded ASCII files into binary maps in SDMToolbox (48). For converting  
376 the ASCII files, we implemented the Maximum training and sensitivity thresholds, as suggested  
377 by Liu et al. (56). Finally, the RVF niche gains or losses were calculated by assessing the difference  
378 between the current and future suitable areas.

379 **References**

- 380 1. He, J. K. (2016). Global low-carbon transition and China's response strategies. *Adv. Clim.*  
381 *Chang Res.*, 7(4), 204-212.
- 382 2. Nasibulina, A. S. (2015). Environmental Ethics in the benefit of Sustainable Development.  
383 In *Advanced Materials Research* (Trans Tech Publications Ltd) Vol. 1073, pp. 2630-2633.
- 384 3. Reay, D., Sabine, C., Smith, P., and Hymus, G. (2007). Intergovernmental Panel on  
385 Climate Change. Fourth Assessment Report. Geneva, Switzerland: Inter-gov-  
386 ermental Panel on Climate Change. Cambridge; UK: Cambridge University Press; 2007. Available  
387 from: [www.ipcc.ch](http://www.ipcc.ch). In *Intergovernmental Panel on Climate Change*.  
388 <https://doi.org/10.1038/446727a>
- 389 4. Change, I. C. (2014). Impact. Adaptation and Vulnerability, IPCC WGII AR5 Summary  
390 for Policymakers.
- 391 5. Baylis, M. (2017). Potential impact of climate change on emerging vector-borne and other  
392 infections in the UK. *Environ. Health* 16(1), 45-51.
- 393 6. Patz, J. A., Campbell-Lendrum, D., Holloway, T., and Foley, J. A. (2005). Impact of  
394 regional climate change on human health. *Nature*. 438(7066), 310–317.  
395 <https://doi.org/10.1038/nature04188>
- 396 7. Simons, R. R., Croft, S., Rees, E., et al., (2019). Using species distribution models to  
397 predict potential hot-spots for Rift Valley Fever establishment in the United  
398 Kingdom. *Plos One*. 14(12), e0225250.
- 399 8. Ellis, B. R., and Wilcox, B. A. (2009). The ecological dimensions of vector-borne disease

- 400 research and control. *Cadernos de Saude Publica*, **25**, S155–S167.
- 401 9. Sintayehu, D. W., Tassie, N., and De Boer, W. F. (2020). Present and future climatic  
402 suitability for dengue fever in Africa. *Infect. Ecol. Epidemiology*, **10**(1), 1782042.
- 403 10. Ferraguti, M., Heesterbeek, H., Martínez-de la Puente, J., et al., (2020). The role of different  
404 *Culex* mosquito species in the transmission of West Nile virus and avian malaria parasites  
405 in Mediterranean areas. *Transbound. Emerg. Dis.* 1-11.
- 406 11. Ogden NH, Lindsay LR, Leighton PA, and Sheppard A. (2013). Predicting the rate of  
407 invasion of the agent of Lyme disease *Borrelia burgdorferi*. *J. Appl. Ecol.* **50**(2),510–8.
- 408 12. Rocklöv, J., Quam, M.B., Sudre, B., et al., (2016). Assessing seasonal risks for the  
409 introduction and mosquito-borne spread of Zika virus in Europe. *EBioMedicine*. **9**, 250-  
410 256.
- 411 13. Boorgula, G. D., Peterson, A. T., Foley, D. H., et al., (2020). Assessing the current and  
412 future potential geographic distribution of the American dog tick, *Dermacentor variabilis*  
413 (Say)(Acari: Ixodidae) in North America. *PloS One*, **15**(8), e0237191.
- 414 14. Anyamba, A., Linthicum, K. J., Small, J. L., et al. (2012). Climate teleconnections and recent  
415 patterns of human and animal disease outbreaks. *PLoS Negl. Trop. Dis.* **6**(1).  
416 <https://doi.org/10.1371/journal.pntd.0001465>
- 417 15. Iacono, G. Lo, Cunningham, A. A., Bett, B., et al. (2018). Environmental limits of Rift Valley  
418 fever revealed using ecoepidemiological mechanistic models. *PNAS*, **115**(31), E7448–  
419 E7456. <https://doi.org/10.1073/pnas.1803264115>
- 420 16. Bird, B. H., Ksiazek, T. G., Nichol, S. T., and MacLachlan, N. J. (2009). Rift Valley fever

- 421 virus. *JAVMA- J AM VET MED A.* **234**(7), 883–893.
- 422 <https://doi.org/10.2460/javma.234.7.883>
- 423 17. Bett, B. K., Otieno, F. T., and Murithi, F. (2019). Climate change and disease dynamics:  
424 Predicted changes in ecological niches for Rift Valley fever in East Africa. In: Ferranti, P.,  
425 Berry, E.M. and Anderson, J.R. (eds), (*Encyclopedia of Food Security and Sustainability* 3),  
426 pp. 469–476.
- 427 18. Redding, D. W., Tiedt, S., Lo Iacono, et al. (2017). Spatial, seasonal and climatic predictive  
428 models of rift valley fever disease across Africa. *Philosophical Transactions of the Royal*  
429 *Society B: Biological Sciences*, **372**(1725), 1–9. <https://doi.org/10.1098/rstb.2016.0165>
- 430 19. Downing, T. E., Ringius, L., Hulme, M., and Waughray, D. (1997). Adapting to climate  
431 change in Africa. *Mitig. Adapt. Strateg. Glob. Chang.* **2**(1), 19–44.
- 432 20. Sadeghieh, T., Waddell, L. A., Ng, V., et al. (2020). A scoping review of importation and  
433 predictive models related to vector-borne diseases, pathogens, reservoirs, or vectors (1999–  
434 2016). *PloS One*, **15**, e0227678.
- 435 21. Mpeshe, S. C., Luboobi, L. S., and Nkansah-Gyekye, Y. (2014). Modeling the impact of  
436 climate change on the dynamics of Rift Valley fever. *Comput. Math. Method M.*  
437 <https://doi.org/10.1155/2014/627586>
- 438 22. Clark, M. H., Warimwe, G. M., Di Nardo, A., et al. (2018). Systematic literature review of  
439 Rift Valley fever virus seroprevalence in livestock, wildlife and humans in Africa from  
440 1968 to 2016. *PLoS Negl. Trop. Dis.* **12**(7), e0006627.
- 441 23. Martini, V., Chevalier, V., Ceccato, P., et al. (2008). The impact of climate change on the

- 442 epidemiology and control of Rift Valley fever. *Rev. Sci. Tec. OIE.* **27**(2), 413–426.  
443 <https://doi.org/10.20506/rst.27.2.1802>
- 444 24. Fouque, F., and Reeder, J. C. (2019). Impact of past and on-going changes on climate and  
445 weather on vector-borne diseases transmission: a look at the evidence. *Infect. Dis.*  
446 *Poverty.* **8**(1), 1-9.
- 447 25. Leedale, J., Jones, A. E., Caminade, C., and Morse, A. P. (2016). A dynamic, climate-  
448 driven model of rift valley fever. *Geospat. Health.* **11**(1S).  
449 <https://doi.org/10.4081/gh.2016.394>
- 450 26. Mweya, C. N. Kimera, S. I., Kija, J. B., and Mboera, L. E. G. (2013). Predicting distribution  
451 of *Aedes aegypti* and *Culex pipiens* complex, potential vectors of Rift Valley fever virus in  
452 relation to disease epidemics in East Africa. *Infect. Ecol. Epidemiology.* **3**, 21748.  
453 <https://doi.org/10.3402/iee.v3i0.21748>
- 454 27. Ochieng, A. O., Nanyingi, M., Kipruto, E., et al. (2016). Ecological niche modelling of Rift  
455 Valley fever virus vectors in Baringo, Kenya. *Infect. Ecol. Epidemiology.* **6**(1), 1–9.  
456 <https://doi.org/10.3402/IEE.V6.32322>
- 457 28. Sindato, C., Stevens, K. B., Karimuribo, E. D., et al. (2016). Spatial Heterogeneity of  
458 Habitat Suitability for Rift Valley Fever Occurrence in Tanzania: An Ecological Niche  
459 Modelling Approach. *PLoS Negl. Trop. Dis.* **10**(9), e0005002.  
460 <https://doi.org/10.1371/journal.pntd.0005002>
- 461 29. Mweya, Clement N., Mboera, L. E. G., and Kimera, S. I. (2017). Climate influence on  
462 emerging risk areas for rift valley fever epidemics in Tanzania. *Am. J. Trop. Med. Hyg.*  
463 **97**(1), 109–114. <https://doi.org/10.4269/ajtmh.16-0444>

- 464 30. Clements, A. C. A., Pfeiffer, D. U., Martin, V., and Otte, M. J. (2007). A Rift Valley fever  
465 atlas for Africa. *Prev. Vet. Med.* **82**(1–2), 72–82.  
466 <https://doi.org/10.1016/j.prevetmed.2007.05.006>
- 467 31. Butterworth, M. K., Morin, C. W., and Comrie, A. C. (2017). An analysis of the potential  
468 impact of climate change on dengue transmission in the southeastern United  
469 States. *Environ. Health Perspect.* **125**(4), 579-585.
- 470 32. Adham, D., Moradi-Asl, E., Vatandoost, H., and Saghafipour, A. (2019). Ecological Niche  
471 Modeling of West Nile Virus Vector in Northwest of Iran. *Oman Med. J.* **34**(6), 514.
- 472 33. Chretien, J.P., Anyamba, A., Bedno, S.A., et al. (2007). Drought-associated chikungunya  
473 emergence along coastal East Africa. *Am. J. Trop. Med. Hyg.* **76**(3), 405-407.
- 474 34. Fischer, D., Thomas, S. M., Suk, J. E., et al. (2013). Climate change effects on  
475 Chikungunya transmission in Europe: geospatial analysis of vector's climatic suitability  
476 and virus' temperature requirements. *Int. J. Health Geogr.* **12**(1), 1-12.
- 477 35. Ciota, A. T., and Keyel, A. C. (2019). The role of temperature in transmission of zoonotic  
478 arboviruses. *Viruses*, **11**(11), 1013.
- 479 36. Franklinos, L. H., Jones, K. E., Redding, D. W., and Abubakar, I. (2019). The effect of  
480 global change on mosquito-borne disease. *Lancet Infect. Dis.* **19**(9), e302-e312.
- 481 37. Di Nardo, A., Rossi, D., Saleh, S. M. L., et al., (2014). Evidence of Rift Valley fever  
482 seroprevalence in the Sahrawi semi-nomadic pastoralist system, Western Sahara. *BMC Vet.*  
483 *Res.* **10**(1), 92.
- 484 38. Nyaruaba, R., Mwaliko, C., Mwau, et al., (2019). Arboviruses in the East African



- 485 Community partner states: a review of medically important mosquito-borne Arboviruses.  
486 Pathog. Glob. Health. *113*(5), 209–228. <https://doi.org/10.1080/20477724.2019.1678939>
- 487 39. Kroeker, A. L., Babiuk, S., Pickering, et al. (2020). Livestock Challenge Models of Rift  
488 Valley Fever for Agricultural Vaccine Testing. *Front. Vet. Sci.* 7.
- 489 40. Spehn, E. M., Rudmann-Maurer, K., Körner, C., and Maselli, D. (2010). Mountain  
490 biodiversity and global change eds. *Global Mountain Biodiversity Assessment*.
- 491 41. Petrova, V., Kristiansen, P., Norheim, G., and Yimer, S. A. (2020). Rift valley fever:  
492 diagnostic challenges and investment needs for vaccine development. *BMJ Glob.*  
493 *Health*, 5(8), e002694.
- 494 42. Javelle, E., Lesueur, A., de Santi, V.P., et al. (2020). The challenging management of Rift  
495 Valley Fever in humans: literature review of the clinical disease and algorithm  
496 proposal. *Ann. Clin. Microbiol. Antimicrob.* *19*(1), 4.
- 497 43. Cutler, S.J., Fooks, A.R. and Van der Poel, W.H., (2010). Public health threat of new,  
498 reemerging, and neglected zoonoses in the industrialized world. *Emerg. Infec. Dis.* *16*(1), 1.
- 499 44. Pérez-Ramírez, E., Cano-Gómez, C., Llorente, F., et al. (2020). External quality assessment  
500 of Rift Valley fever diagnosis in 17 veterinary laboratories of the Mediterranean and Black  
501 Sea regions. *Plos One*, *15*(9), e0239478.
- 502 45. World Health Organization Global Vector Control Response 2017–2030. [(accessed on 4  
503 February 2021)];2017 Available online:  
504 [https://apps.who.int/iris/bitstream/handle/10665/259205/9789241512978-](https://apps.who.int/iris/bitstream/handle/10665/259205/9789241512978-eng.pdf;jsessionid=9C11656832A16B1404639714E44BF08B?sequence=1)  
505 [eng.pdf;jsessionid=9C11656832A16B1404639714E44BF08B?sequence=1](https://apps.who.int/iris/bitstream/handle/10665/259205/9789241512978-eng.pdf;jsessionid=9C11656832A16B1404639714E44BF08B?sequence=1)

- 506 46. Nicholson S.E. (1996). A review of climate dynamics and climate variability in eastern  
507 Africa. In *The Limnology, Climatology and Paleoclimatology of the East African Lakes*,  
508 Johnson TC, Odada E (eds). (Gordon and Breach), pp. 25–56.
- 509 47. Greenway, P. J. (1973). A classification of the vegetation of East Africa. *Kirkia*, **9**(1), 1–68.
- 510 48. Brown, J. L. (2014). SDMtoolbox: A python-based GIS toolkit for landscape genetic,  
511 biogeographic and species distribution model analyses. *Methods Ecol. Evol.* **5**(7), 694–700.  
512 <https://doi.org/10.1111/2041-210X.12200>
- 513 49. Naimi, B., Skidmore, A. K., Groen, T. A., and Hamm, N. A. S. (2011). Spatial  
514 autocorrelation in predictors reduces the impact of positional uncertainty in occurrence data  
515 on species distribution modelling. *J. Biogeogr.* **38**(8), 1497–1509.  
516 <https://doi.org/10.1111/j.1365-2699.2011.02523.x>
- 517 50. Hijmans, R. J., Cameron, S. E., Parra, J. L., et al. (2005). Very high resolution interpolated  
518 climate surfaces for global land areas. *Int. J. Climatol.* **25**(15), 1965–1978.  
519 <https://doi.org/10.1002/joc.1276>
- 520 51. Gent, P. R., Danabasoglu, G., Donner, L. J., et al. (2011). The community climate system  
521 model version 4. *J. Clim.* **24**(19), 4973–4991. <https://doi.org/10.1175/2011JCLI4083.1>
- 522 52. Halvorsen, R., Mazzoni, S., Dirksen, J. W., et al. (2016). How important are choice of  
523 model selection method and spatial autocorrelation of presence data for distribution  
524 modelling by MaxEnt?. *Ecol. Modell.* **328**, 108–118.
- 525 53. Phillips, S. B., Aneja, V. P., Kang, D., & Arya, S. P. (2006). Modelling and analysis of the  
526 atmospheric nitrogen deposition in North Carolina. *Int. J. Global. Environ. Issues.* **6**(2–3),

- 527           231–252. <https://doi.org/10.1016/j.ecolmodel.2005.03.026>
- 528   54. Beaumont, L. J., Hughes, L., and Poulsen, M. (2005). Predicting species distributions: Use  
529       of climatic parameters in BIOCLIM and its impact on predictions of species' current and  
530       future distributions. *Ecol. Modell.* **186**(2), 251–270.  
531       <https://doi.org/10.1016/j.ecolmodel.2005.01.030>
- 532   55. Elith, J., Phillips, S. J., Hastie, T., et al. (2011). A statistical explanation of MaxEnt for  
533       ecologists. *Divers. Distrib.* **17**(1), 43-57.
- 534   56. Liu, C., Newell, G., and White, M. (2016). On the selection of thresholds for predicting  
535       species occurrence with presence-only data. *Ecol. Evol.* **6**(1), 337-348.

## 536 **Acknowledgments**

537 The authors thank Josephat K. Saina for his tremendous assistance in the model evaluation and  
538 statistics and insights on an earlier draft of the manuscript. Much appreciation is also accorded to  
539 colleagues at the Wuhan Institute of Virology, Chinese Academy of Sciences, for their invaluable  
540 support of this project. We also wish to thank Miriam Ngarega (University of Nairobi) for her  
541 critical review of the manuscript and language improvement. We extend sincere appreciation to  
542 the committed team members at Wuhan Botanical Garden. This study was funded by the Youth  
543 Innovation Promotion Association CAS.

544

## 545 **Conflicts of Interest**

546 The authors declare no competing interests.

547

## 548 **Supplemental information**

549 **Figure S1** AUC result of MaxEnt modeling.

550 **Figure S2** Importance of environment variables to Rift Valley fever by jackknife analysis.

551 **Table S1** Rift Valley fever outbreak cases used in MaxEnt Modeling.

552

## 553 **Figure titles**

554 **Figure 1** Distribution of the Rift Valley fever outbreak cases and geographic positions of  
555 occurrence points included in the modeling with elevation data.

556 **Figure 2** Risk map for Rift Valley fever transmission in East Africa generated after MaxEnt  
557 modeling of the current period.

558 **Figure 3** Potential climatic suitability for Rift Valley fever through time and under different RCPs.

559 **Figure 4.** Distributional changes Rift Valley fever in East Africa, obtained by comparing binary  
560 changes between the current and future potential distribution.

561 **Table 1** Environmental variables selected for modeling the distribution of Rift Valley fever in East Africa using MaxEnt

| Category    | Code               | Variables                                                  | Unit                 | Source                 |
|-------------|--------------------|------------------------------------------------------------|----------------------|------------------------|
| Bioclimatic | Bio2               | Mean Diurnal Range (Mean of monthly (max temp - min temp)) | °C * 10              | WorldClim              |
|             | Bio4               | Air temperature seasonality                                | -                    | WorldClim              |
|             | Bio8               | Mean Temperature of Wettest Quarter                        | °C * 10              | WorldClim              |
|             | Bio13              | Precipitation of Wettest Month                             | mm/month             | WorldClim              |
|             | Bio14              | Precipitation of the driest month                          | mm/month             | WorldClim              |
|             | Bio18              | Precipitation of Warmest Quarter                           | mm/quarter           | WorldClim              |
|             | Bio19              | Precipitation of Coldest Quarter                           | mm/quarter           | WorldClim              |
| Topographic | Elevation          | Elevation                                                  | m. a.s.l.            | SRTM                   |
|             | Slope              | Slope                                                      | % degree             | Derived from elevation |
| Social      | Land use           | -                                                          | -                    | Geo-Network            |
|             | Population density | -                                                          | People/km2           | Geo-Network            |
|             | Green land cover   | -                                                          | Vegetation cover/km2 | Geo-Network            |
|             | Cattle             | -                                                          | Cattle/km2           | Geo-Network            |
|             | Goats              | -                                                          | Goats/km2            | Geo-Network            |
|             | Sheep              | -                                                          | Sheep/km2            | Geo-Network            |

563 **Table 2** AUC statistics for the MaxEnt's model performance for Rift Valley Fever in East Africa

| Scenario                  | Current | 2050s   |         | 2070s   |         |
|---------------------------|---------|---------|---------|---------|---------|
|                           |         | RCP 4.5 | RCP 8.5 | RCP 4.5 | RCP 8.5 |
| <b>AUC mean</b>           | 0.866   | 0.895   | 0.809   | 0.867   | 0.885   |
| <b>Standard Deviation</b> | 0.009   | 0.011   | 0.147   | 0.027   | 0.016   |

564

565

566 **Table 3** Relative contributions (%) and permutation importance of environmental variables to  
 567 the MaxEnt model under the current conditions of the Rift Valley fever virus in East Africa.

| Variable           | Percent contribution | Permutation importance |
|--------------------|----------------------|------------------------|
| Bio4               | <b>10.6</b>          | 8.8                    |
| Land use           | <b>9.9</b>           | 8.4                    |
| Population density | <b>9.8</b>           | 9.6                    |
| Bio19              | 8.8                  | 10.5                   |
| Elevation          | 8.7                  | 10.1                   |
| Cattle             | 7.5                  | 2.9                    |
| Green land cover   | 6.4                  | 7.5                    |
| Soil type          | 6.3                  | 4.4                    |
| Bio2               | 5.0                  | 3.7                    |
| Slope              | 5.0                  | 2.8                    |
| Bio14              | 4.7                  | 6.5                    |
| Bio13              | 4.5                  | 6.8                    |
| Sheep              | 4.4                  | 7.4                    |
| Bio18              | 4.2                  | 4.2                    |
| Goats              | 2.4                  | 3.1                    |
| Bio8               | 1.9                  | 3.2                    |

568

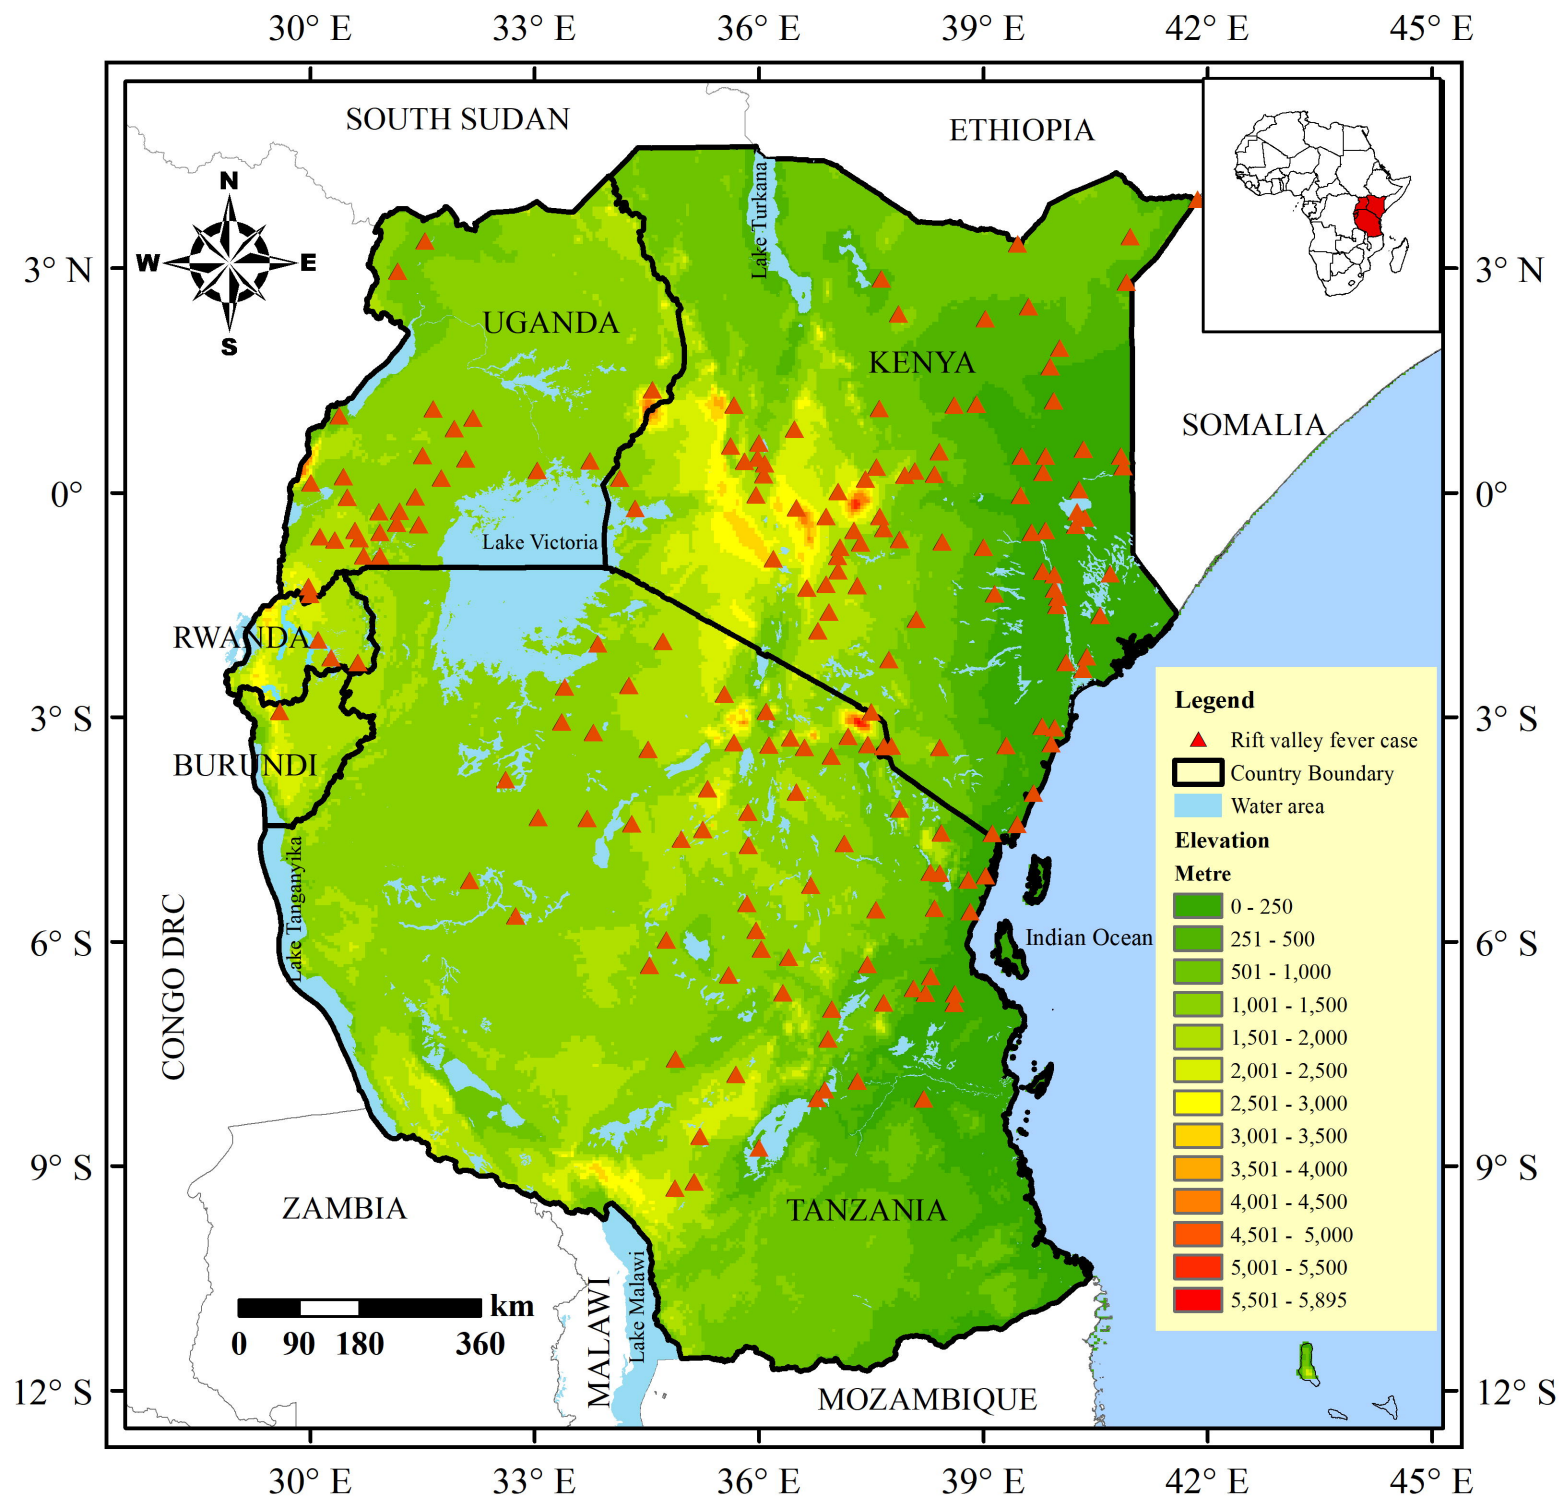



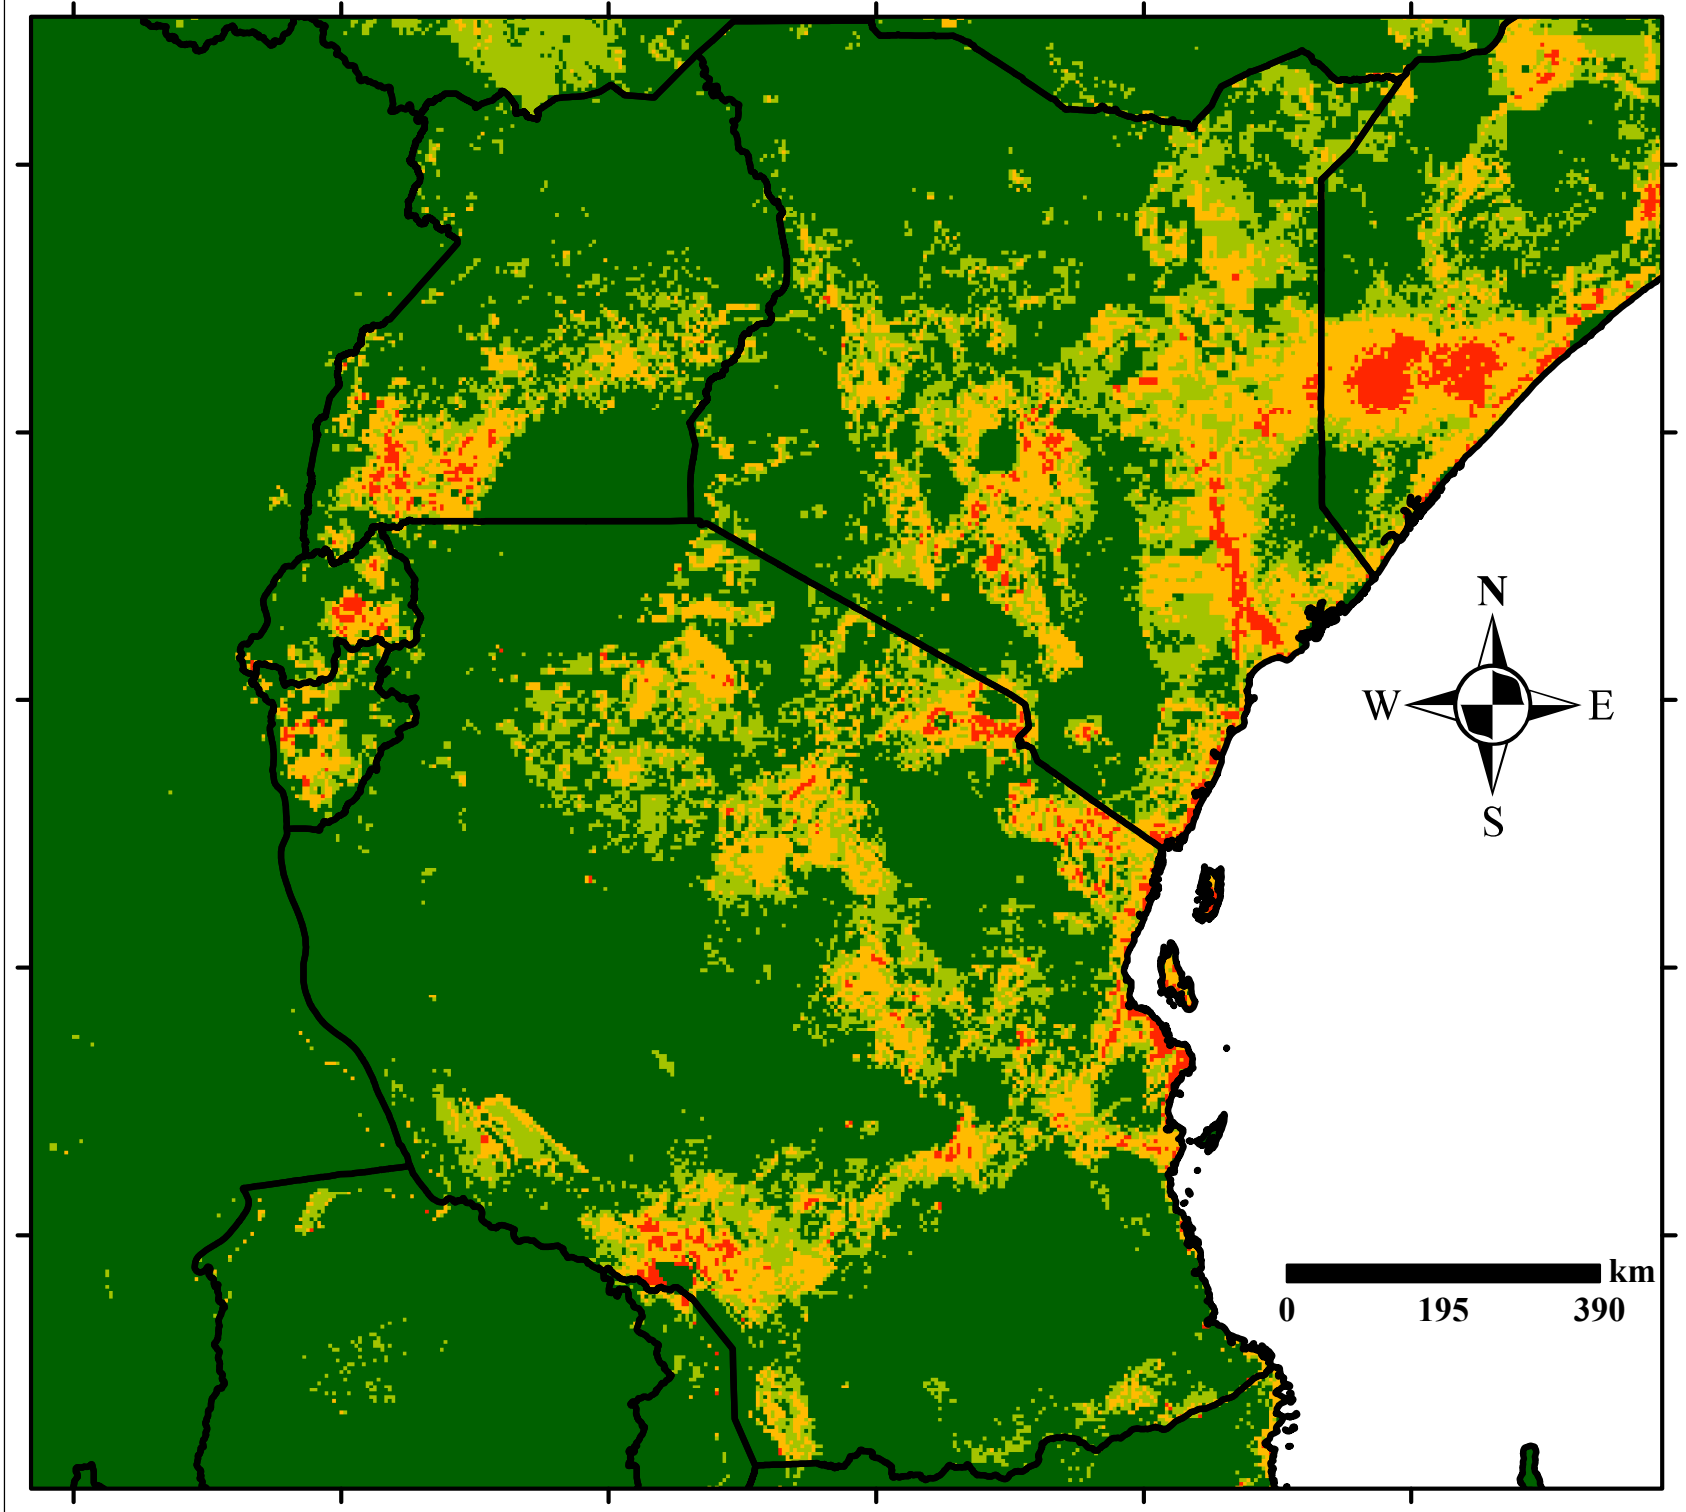

# Legend

## Climatic suitability

-  No data
-  Low
-  Medium
-  High

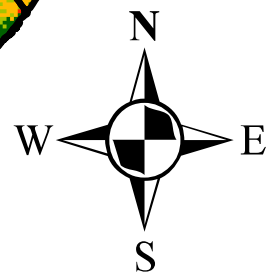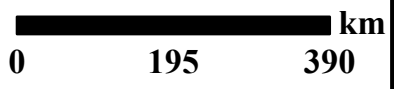

2050

2070

bioRxiv preprint doi: <https://doi.org/10.1101/2021.03.03.433832>; this version posted March 4, 2021. The copyright holder for this preprint (which was not certified by peer review) is the author/funder. All rights reserved. No reuse allowed without permission.

RCP4.5

RCP4.5

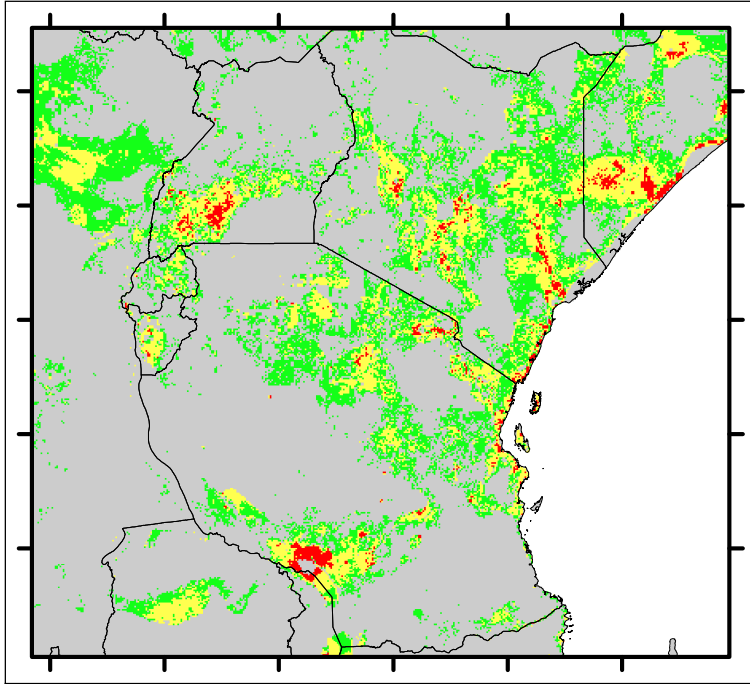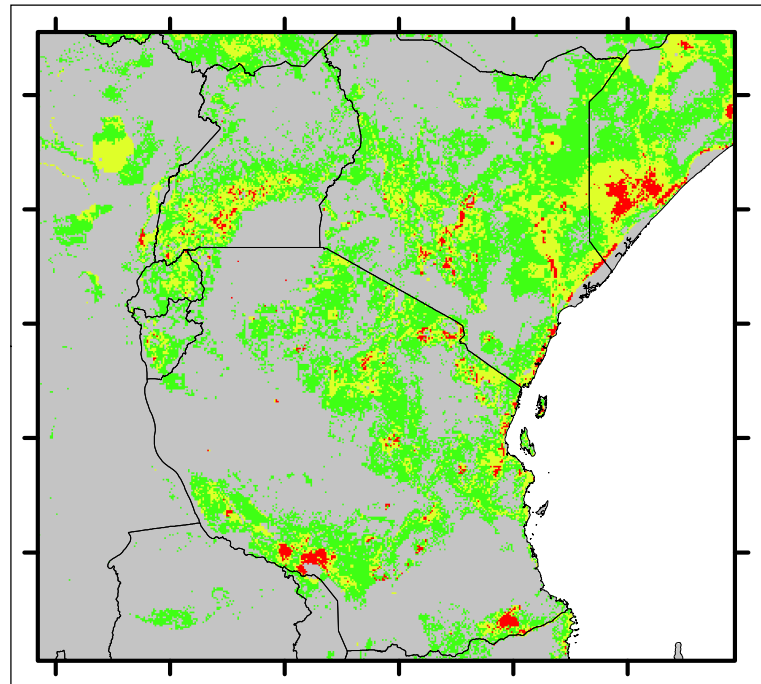

RCP8.5

RCP8.5

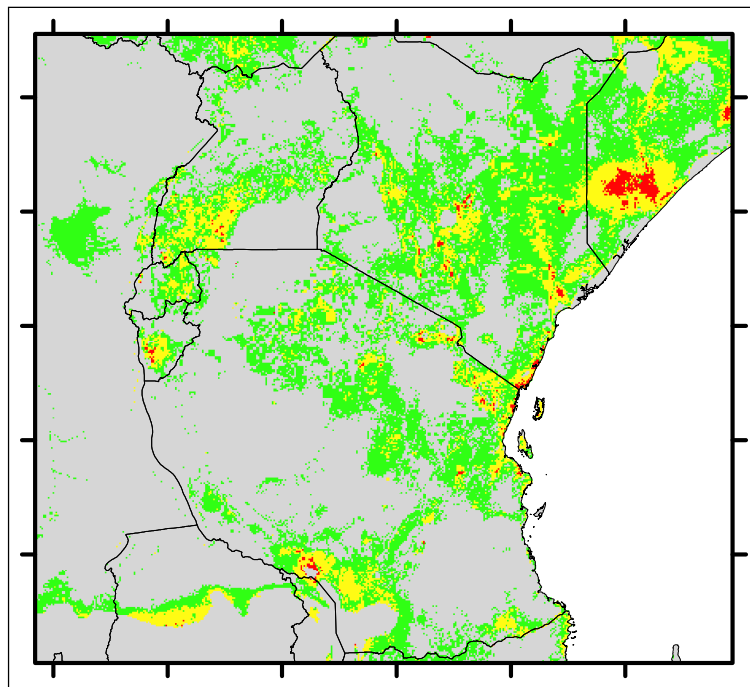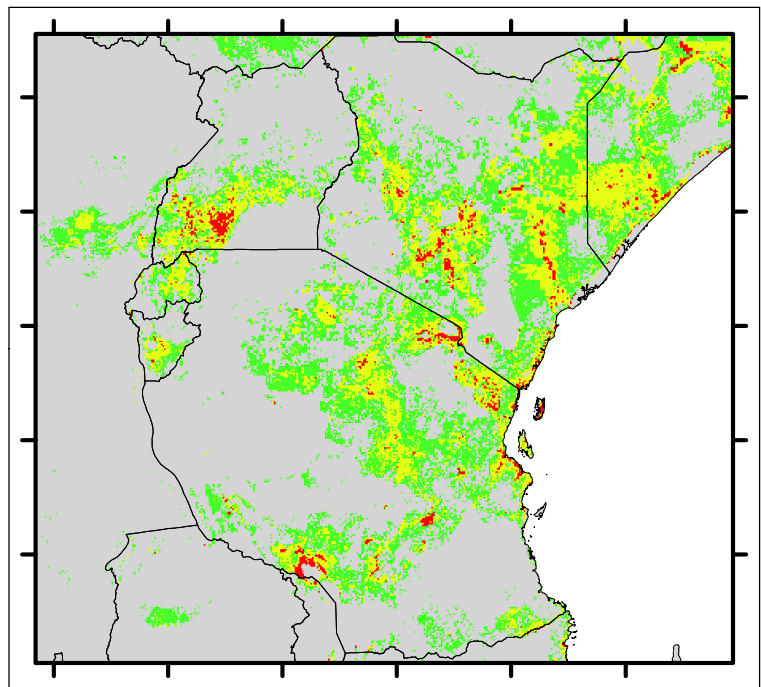

## Legend

-  Country boundary
-  No data
-  Low
-  Medium
-  High

2050

2070

bioRxiv preprint doi: <https://doi.org/10.1101/2021.03.03.433832>; this version posted March 4, 2021. The copyright holder for this preprint (which was not certified by peer review) is the author/funder. All rights reserved. No reuse allowed without permission.

RCP4.5

RCP4.5

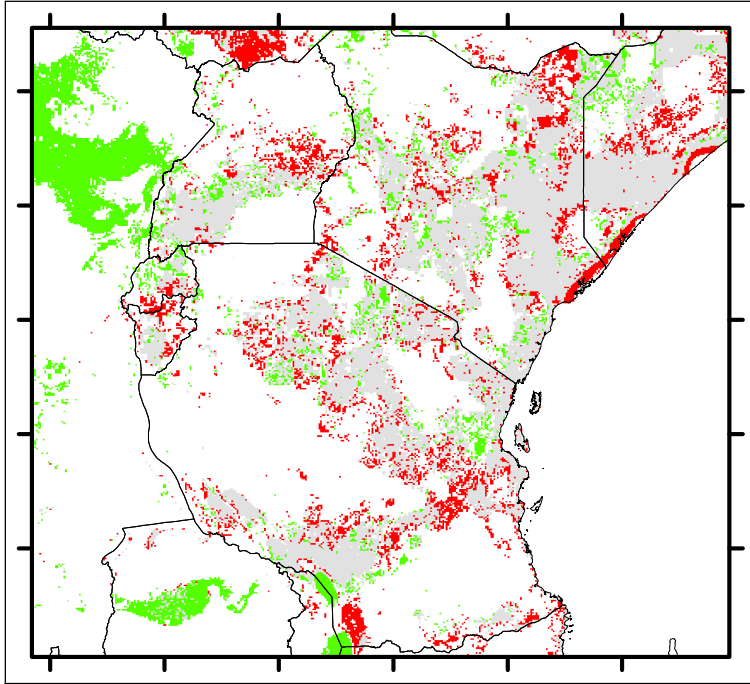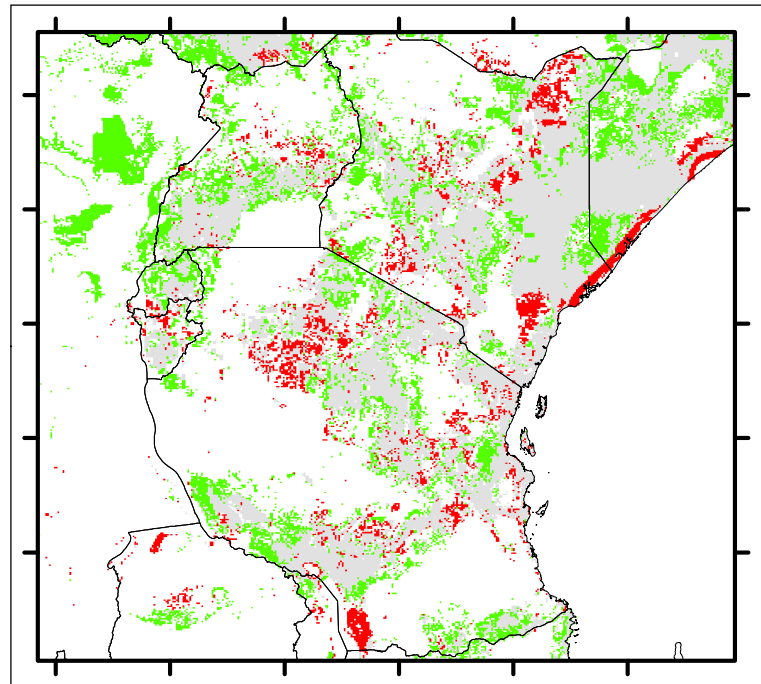

RCP8.5

RCP8.5

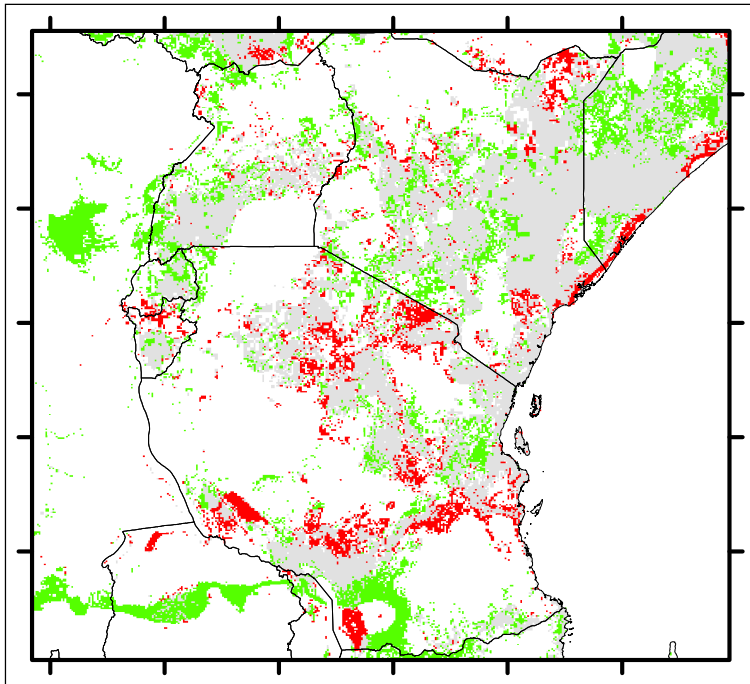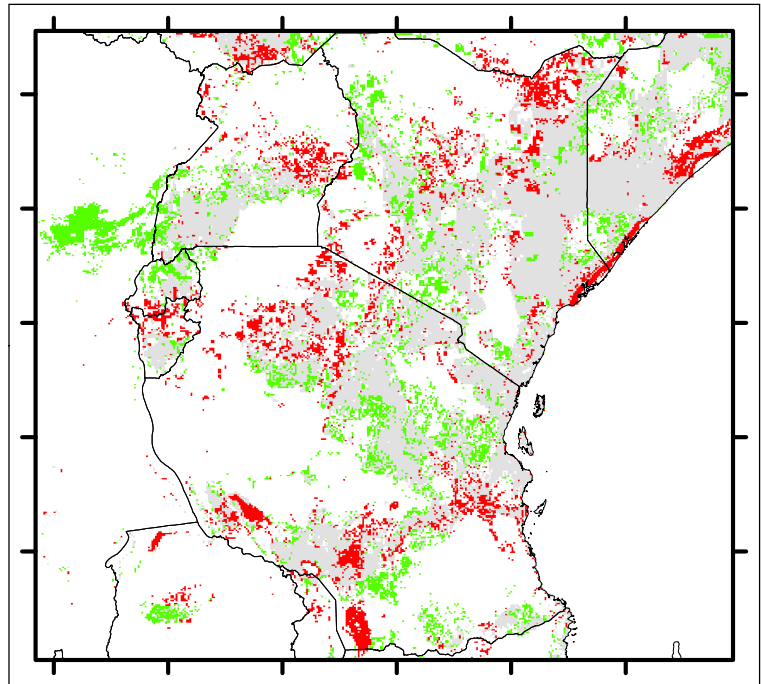

## Legend

-  Range expansion
-  Unsuitable
-  No change
-  Range contraction

0 415 830 km
